# Supplementary figures and images for: Stenosing Crohn’s disease patients display gut autophagy/oxidative stress imbalance
Source: PubMed Central journal article supplement — Sci Rep. 2024 Nov 9;14:27312. doi: 10.1038/s41598-024-79308-z (PMC11549411; doi:10.1038/s41598-024-79308-z), 2024-11-09

### FULLSCAN BLOT IMAGES

Figure 1A

Vinculin 124 KDa

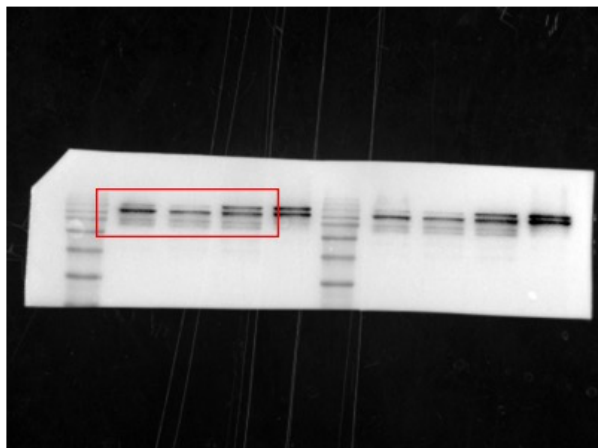

Lc3 14-16 KDa

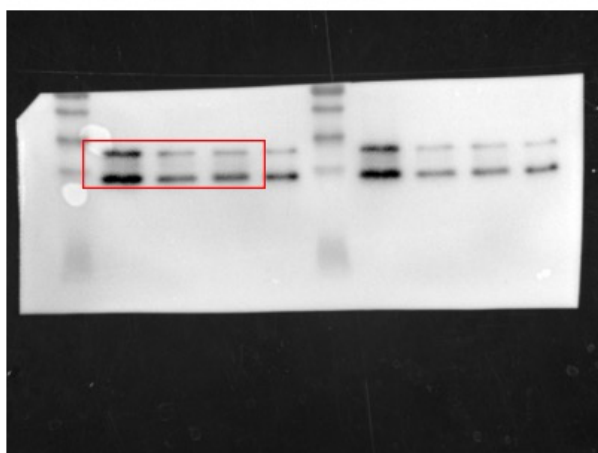

Figure 1C

p62 62 KDa

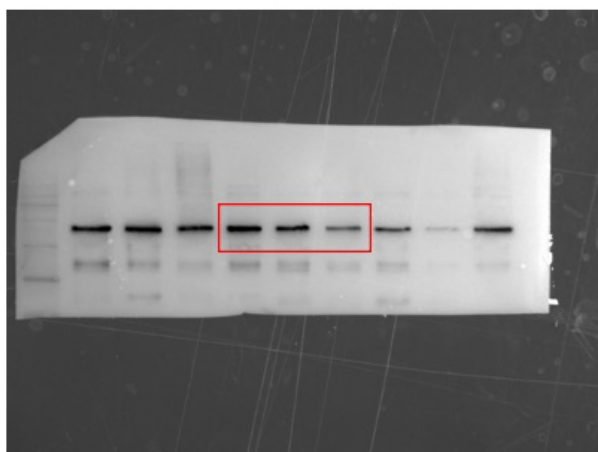

Actin 45 KDa

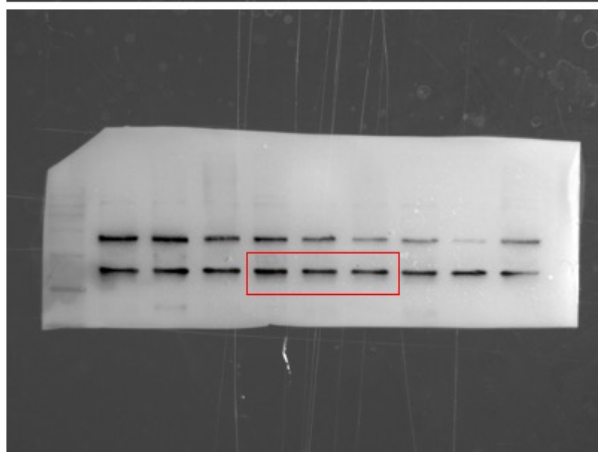

Supplement: 41598_2024_79308_MOESM1_ESM.pdf [file 41598_2024_79308_MOESM1_ESM.pdf]
